# Supplementary material
Source: PubMed Central journal article supplement (PMC4135964)
Supplement: JVI.01164-14_zjv999099299so1.pdf [file JVI.01164-14_zjv999099299so1.pdf]

1 **Appendix: Supplemental Tables and Figures**

2

3 *Table A1. Vaccine peptides in Env V1/V2 predicted to bind HLA alleles with high affinity*

4 Binding affinity was predicted for peptides in the V1/V2 region of envelope with the class I and  
 5 class II HLA molecules expressed by trial participants. The table lists the HXB2 start positions  
 6 and amino acid residues of peptides with predicted binding affinity (IC<sub>50</sub>) < 100 nM for at least  
 7 one HLA allele. The predictions were different for the MN subtype-B rgp120 vaccine  
 8 immunogen and the 92TH023 CRF01\_AE ALVAC insert due to differences in their amino acid  
 9 sequence. These peptides that are predicted to bind with high affinity are not necessarily the  
 10 same peptides that were considered to be potential epitopes in the T-cell based sieve analysis.  
 11 This is because a more complex method was used to select appropriate “binder” and “escape”  
 12 binding affinity thresholds for the analysis (see Materials and Methods for details).

13

| Predicted CD8+ T-cell epitopes |                    | Predicted CD4+ T-cell epitopes |                      |
|--------------------------------|--------------------|--------------------------------|----------------------|
| MN immunogen                   | CRF01_AE immunogen | MN immunogen                   | CRF01_AE immunogen   |
| 147-GTIKGGEMK                  | 151-TDEVRNCSF      | 154-MKNCSFNITTSIGDK            | 155-RNCSFNMTTEL RDKK |
| 153-EMKNCSFNI                  | 153-EVRNCSFNM      | 155-KNCSFNITTSIGDKM            | 156-NCSFNMTTEL RDKKQ |
| 157-CSFNITTSI                  | 157-CSFNMTTEL      | 156-NCSFNITTSIGDKMQ            | 164-ELRDKKQKVHALFYK  |
| 163-TSIGDKMQK                  | 158-SFNMTTEL R     | 157-CSFNITTSIGDKMQK            | 165-LRDKKQKVHALFYKL  |
| 165-IGDKMQKEY                  | 161-MTTEL RDKK     | 158-SFNITTSIGDKMQKE            | 166-RDKKQKVHALFYKLD  |
| 168-KMQKEYALL                  | 168-KKQKVHALF      | 159-FNITTSIGDKMQKEY            | 167-DKKQKVHALFYKLDI  |
| 169-MQKEYALLY                  | 169-KQKVHALFY      | 163-TSIGDKMQKEYALLY            | 168-KKQKVHALFYKLDIV  |
| 171-KEYALLYKL                  | 171-KVHALFYKL      | 164-SIGDKMQKEYALLYK            | 169-KQKVHALFYKLDIVP  |
| 173-YALLYKLDI                  | 174-ALFYKLDIV      | 165-IGDKMQKEYALLYKL            | 170-QKVHALFYKLDIVPI  |
| 174-ALLYKLDIE                  | 175-LFYKLDIVP      | 166-GDKMQKEYALLYKLD            | 171-KVHALFYKLDIVPIE  |
| 175-LLYKLDIEP                  | 176-FYKLDIVPI      | 167-DKMQKEYALLYKLDI            |                      |
| 176-LYKLDIEPI                  |                    | 168-KMQKEYALLYKLDIE            |                      |
|                                |                    | 169-MQKEYALLYKLDIEP            |                      |
|                                |                    | 170-QKEYALLYKLDIEPI            |                      |

14

15

16

17 *Table A2. HLA class I binding capacity (IC<sub>50</sub> nM) with V2 peptides*

18 Selected 9-mer peptides were tested for their ability to bind the class I HLA A\*02 alleles  
19 expressed by RV144 participants. The peptides were selected either because they were included  
20 in the RV144 vaccine (either in the vector or the protein boost) or because they were common  
21 variants isolated from infected trial participants. The same peptides were also used to assay T-  
22 cell responses in IFN- $\gamma$  ELISpot assays.

23

| Sequence (HXB2 168-176)  | A*02:01 | A*02:03 | A*02:07 |
|--------------------------|---------|---------|---------|
| KMQKEYALL †              | 719     | 12      | 10585   |
| KKQKVHALF ‡              | -       | 2281    | -       |
| KKQQVYALF <sup>V,P</sup> | -       | 25294   | -       |
| KKQKFYALF <sup>V,P</sup> | -       | -       | -       |
| KRQQVHALF <sup>V</sup>   | -       | -       | -       |
| KQRKVQALF <sup>V</sup>   | -       | 25667   | -       |
| RKQQISALF <sup>V</sup>   | 34021   | -       | -       |
| KQQKVYALF <sup>V,P</sup> | -       | -       | -       |
| KQQNFYALF <sup>V</sup>   | 1768    | -       | 36940   |
| KQQQIHALF <sup>P</sup>   | 16306   | -       | 37102   |

24

25 “-” indicates IC<sub>50</sub> > 50,000 nM

26 † subtype B (MN) sequence

27 ‡ CRF01\_AE (92TH023) sequence  
28 (92TH023 is identical to A244 sequence in this region)

29 <sup>V</sup> sequence isolated from infected vaccine recipient

30 <sup>P</sup> sequence isolated from infected placebo recipient

31

32

33

34 *Table A3. HLA class II binding capacity (IC<sub>50</sub> nM) with V2 peptides*

35 Selected 15-mer peptides were tested for their ability to bind class II HLA molecules expressed  
 36 by RV144 participants. The peptides were selected either because they were part of the RV144  
 37 vaccine (either in the vector or the protein boost) or because they were common variants isolated  
 38 from infected trial participants. The same peptides were also used to assay T-cell responses in  
 39 IFN- $\gamma$  ELISpot assays.

40

| Sequence (HXB2 157-181)      | DRB1*03:01 | DRB1*12:01 | DRB1*15:01 | DRB3*02:02 | DRB4*01:01 | DRB5*01:01 |
|------------------------------|------------|------------|------------|------------|------------|------------|
| DKMQKEYALLYKLDI <sup>†</sup> | 80         | 71         | 93         | -          | 124        | 2090       |
| DKKQKVHALFYKLDI <sup>‡</sup> | 39312      | 10         | 71         | -          | 371        | -          |
| DKKQKVHALFYRLDI <sup>P</sup> | 26963      | 6.7        | 60         | -          | 486        | 18896      |
| DKQQKVHALFYRLDI <sup>V</sup> | -          | 16         | 324        | -          | 697        | 23743      |
| DKQHKVHALFYKLDI <sup>V</sup> | -          | 11         | 366        | -          | 222        | -          |
| DKRRMVHALFYRLDI <sup>V</sup> | 16654      | 5.3        | 15         | 42166      | 72         | 235        |
| DKKQKVRALFYKLDI <sup>P</sup> | -          | 3.6        | 20         | -          | 303        | 958        |
| DKQQKVYALFYNLDI <sup>P</sup> | 64         | 47         | 3964       | 21290      | 18920      | 13113      |

41

42 “-” indicates IC<sub>50</sub> > 50,000 nM

43 <sup>†</sup> subtype-B (MN) sequence

44 <sup>‡</sup> CRF01\_AE (92TH023) sequence  
 45 (92TH023 is identical to A244 sequence in this region)

46 <sup>V</sup> sequence isolated from infected vaccine recipient

47 <sup>P</sup> sequence isolated from infected placebo recipient

48

49 *Table A4. HLA associations with A\*02 in RV144 uninfected vaccine and placebo recipients*  
 50 To determine if the associations with A\*02 in the trial could be attributed to other HLA alleles  
 51 we performed a genetic analysis to identify HLA alleles in linkage-disequilibrium with the A\*02  
 52 allele. All HLA alleles found in RV144 participants that were outside the HLA-A locus were  
 53 tested for an association with the A\*02 allele. This included alleles at the HLA- B, Cw, DRB1-5,  
 54 DPA1, DPB1, DQA1, DQB1 loci (92 alleles total). The analysis was performed using the HLA  
 55 types of uninfected participants only (vaccine and placebo recipients). Each allele was tested  
 56 using a Fisher's exact test of the 2 x 2 contingency table containing the number of participants  
 57 carrying the alleles (both, neither or one of each). The p-values were adjusted for multiple tests  
 58 using the Bonferroni method. All q-values < 0.1 are shown in the table. The analysis revealed an  
 59 HLA haplotype A\*0207:B\*4601:Cw\*0102 that is common in the RV144 cohort (est. ~14%) and  
 60 has been previously documented as one of the most common haplotypes in ethnic northeast  
 61 Thais [75] and other southeast Asian ethnicities [83,84]. This led us to test if any four-digit HLA  
 62 alleles were associated with A\*0207 in trial participants (196 four-digit alleles total). This further  
 63 indicated that two class II alleles DRB1\*0901 and DQB1\*0303 may also be associated with  
 64 A\*0207 and this haplotype, but the estimated frequency is lower in RV144 participants (6%) and  
 65 in ethnic northeastern Thais (~4%) [85].

66

| <b>A*02 associations<br/>with two-digit alleles</b> | <b>p-value</b> | <b>q-value</b> |
|-----------------------------------------------------|----------------|----------------|
| B*46                                                | 5.6e-9         | 5.2e-7         |
| Cw*01                                               | 1.1e-8         | 1.0e-6         |

| <b>A*0207 associations<br/>with four-digit alleles</b> | <b>p-value</b> | <b>q-value</b> |
|--------------------------------------------------------|----------------|----------------|
| Cw*0102                                                | 1.5e-19        | 2.9e-17        |
| B*4601                                                 | 2.6e-18        | 5.0e-16        |
| DQB1*0303                                              | 5.6e-05        | 0.011          |
| DRB1*0901                                              | 3.1e-04        | 0.060          |

67

68 *Table A5. Vaccine efficacy in HLA-defined subgroups associated with A\*02*  
69 Vaccine efficacy was estimated in several HLA-determined subgroups to address the hypothesis  
70 that higher VE associated with HLA-A\*02 may be attributed to an association with other HLA  
71 alleles in a haplotype with HLA-A\*02. The frequency of each subgroup in the RV144 study was  
72 estimated from the fraction of 280 HLA-typed uninfected vaccine and placebo recipients  
73 carrying all alleles indicated (number of individuals indicated in parentheses). VE is estimated  
74 using the “case-only” method, with a p-value testing that null hypothesis that  $VE(HLA+) = 0$ .  
75 The interaction-p is for the test that  $VE(HLA+) = VE(HLA-)$  where “HLA+” is the subgroup  
76 carrying all alleles and “HLA-” is the remainder of the cohort. None of the p-values were  
77 adjusted for multiple tests.

| Subgroup                                                 | Est.<br>frequency<br>in RV144 | VE(HLA+) | 95% CI |     | p-value | interaction-p |
|----------------------------------------------------------|-------------------------------|----------|--------|-----|---------|---------------|
| <b>A*02</b>                                              | 51% (142)                     | 54%      | 20%    | 73% | 0.006   | 0.0495        |
| <b>A*0207 &amp; B*4601 &amp; Cw*0102</b>                 | 14% (38)                      | 71%      | 13%    | 91% | 0.029   | 0.095         |
| <b>A*0207 &amp; B*4601 &amp; Cw*0102 &amp; DQB1*0303</b> | 6% (18)                       | 80%      | -71%   | 98% | 0.14    | 0.249         |
| <b>A*0207 &amp; B*4601 &amp; Cw*0102 &amp; DRB1*0901</b> | 6% (16)                       | 80%      | -71%   | 98% | 0.14    | 0.249         |
| <b>A*0207</b>                                            | 16% (45)                      | 71%      | 20%    | 89% | 0.018   | 0.067         |
| <b>A*0203</b>                                            | 22% (63)                      | 31%      | -62%   | 70% | 0.398   | 0.991         |
| <b>A*0201</b>                                            | 12% (33)                      | 50%      | -100%  | 87% | 0.329   | 0.638         |
| <b>Cw*0102</b>                                           | 32% (90)                      | 31%      | -22%   | 61% | 0.204   | 0.998         |
| <b>B*4601 (subset of Cw*0102)</b>                        | 28% (78)                      | 28%      | -32%   | 61% | 0.29    | 0.862         |
| <b>DQB1*0303</b>                                         | 22% (62)                      | 41%      | -28%   | 73% | 0.185   | 0.654         |
| <b>DRB1*0901</b>                                         | 17% (48)                      | 36%      | -49%   | 72% | 0.303   | 0.857         |
| <b>non-A*0207 &amp; Cw*0102 &amp; B*4601</b>             | 18% (49)                      | -7%      | -116%  | 47% | 0.858   | 0.163         |
| <b>non-A*0207 &amp; DQB1*0303</b>                        | 15% (41)                      | 17%      | -93%   | 64% | 0.671   | 0.626         |

79

80

81 **Figure A1. Predicted vaccine CD4+ T-cell epitopes in the V1/V2 region of envelope.**  
 82 Potential vaccine-induced CD4+ T-cell epitopes were identified using computational prediction  
 83 of peptide binding with HLA class II molecules (NetMHCIIpan, [35]). In the analysis we  
 84 considered the HLA alleles found in each RV144 participant and all 15-mer peptides in the  
 85 V1/V2 region of envelope of both the CRF01\_AE (92TH023) and the subtype-B (MN) vaccine  
 86 immunogens. Peptides with a predicted  $IC_{50} < 100$  nM were considered potential epitopes (solid  
 87 bars). A T-cell based sieve analysis was performed using these predictions, but it did not detect a  
 88 difference in the number of predicted binding “escapes” in vaccine versus placebo recipients.

**Figure A1. Predicted vaccine CD4+ T-cell epitopes in the V1/V2 region of envelope**

**A**

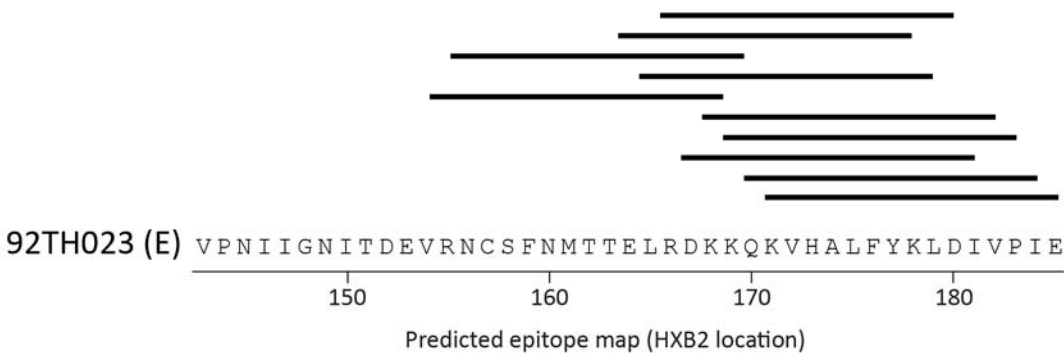

**B**

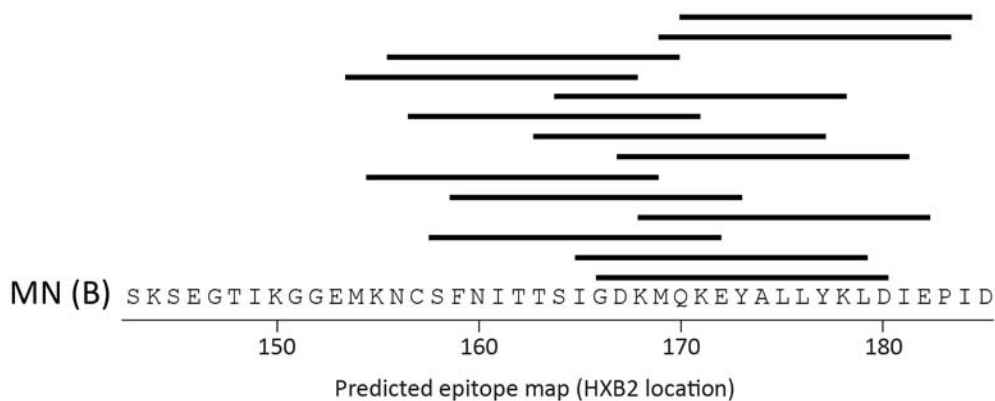

89  
 90  
 91  
 92  
 93  
 94

95 **Appendix: Supplemental Methods**

96 *Experimental validation of the A\*02-KMQKEYALL T-cell epitope*

97 Subjects. The subjects were long term non-progressors (LTNPs) recruited and enrolled at the  
98 HIV Vaccine Trials Units (M.J.M., principle investigator). The appropriate Institutional Review  
99 Boards approved the studies, and volunteers provided written consent. They were defined as HIV  
100 infected for more than 11 years, with repeated CD4+ T cell counts over 500 cells per  $\mu$ l or  
101 CD4% over 28% and viral load <10,000 copies per ml in the absence of antiretroviral therapy.

102

103 Peptides. Peptides for assaying T-cell responses to the V2 region were chosen based on the  
104 locations of the predicted CD8+ (HXB2 168-176) and CD4+ (HXB2 167-181) epitopes. Two  
105 variants of these peptides corresponded to the MN strain (KMQKEYALL and  
106 DKMQKEYALLYKLDI) and the 92TH023 strain (same as CM244 strain) (KKQKVHALF,  
107 DKKQKVHALFYRLDI) that were present in the RV144 vaccine. Eight other variants (see  
108 **Table S2**) corresponded to breakthrough viruses isolated from infected RV144 participants.  
109 Biosynthesis Inc (Lewisville, TX) synthesized the peptides. Note that due to the high variability  
110 of V2 it is unlikely that the peptides matched the sequences of viruses that were present within  
111 each subject.

112

113 IFN- $\gamma$  Elispot assay. Cryopreserved PBMCs were thawed at 37°C and re-suspended  
114 ( $2 \times 10^6$  cells/ml) in R10 medium (RPMI-HEPES with 10% fetal bovine  
115 serum supplemented with L-glutamine, and penicillin-streptomycin). Cell viability  
116 and recovery were both determined after initial thawing and overnight incubation  
117 at 37°C and 5% CO<sub>2</sub>. Multiscreen (Millipore, Bedford, MA.) filtration plates were coated with  
118 100 $\mu$ l of the anti-IFN- $\gamma$  monoclonal antibody 1-D1K/well (10  $\mu$ g/ml; Mabtech, Nacka, Sweden),  
119 incubated overnight at 4°C, washed with phosphate-buffered saline (PBS), and blocked (37°C  
120 for 2 h) with R10 medium. PBMCs were washed, and 200,000 cells suspended in 75  $\mu$ l of  
121 medium were plated in each well. Peptides were diluted in 25  $\mu$ l of RPMI-HEPES and added to  
122 appropriate wells at a 2  $\mu$ g/ml final concentration. The peptide solvent, dimethyl sulfoxide, was  
123 kept below 0.01% final concentration in the peptide mixture. Cells were stimulated with  
124 individual peptides overnight at 37°C (5% CO<sub>2</sub>). IFN- $\gamma$  secretion was detected colorimetrically  
125 by sequential incubations with secondary biotinylated anti-IFN- $\gamma$  7-B6-1 monoclonal antibody (1

126  $\mu\text{g/ml}$ ; Mabtech), streptavidin-alkaline phosphatase (BD Pharmingen, San Diego, CA.), and  
127 nitro-blue tetrazolium chloride and 5-bromo-4-chloro-3'-indolyphosphate p-toluidine salt  
128 substrate (Thermo Scientific Rockford, IL). Phytohemagglutinin ( $2 \mu\text{g/ml}$ ; Murex Biotech,  
129 Dartford, UK) or CEF peptide pool (Mabtech) stimulations were used as a positive control. For  
130 the negative control, peptide diluent was used. Spots formed by IFN- $\gamma$ -secreting cells were  
131 counted with an automated ImmunoSpot plate reader (Cellular Technology LTD, Shaker  
132 Heights, Ohio), and results are presented as spot-forming cells (SFC) per  $10^6$  PBMCs. A  
133 response was considered positive when the mean SFC for the experimental wells was at least  
134 two-fold greater than the mean SFC for the negative control wells and the mean SFC/ $10^6$  cells in  
135 the experimental wells was  $>50$  after subtraction of the mean SFC/ $10^6$  cells of the negative  
136 control wells.

137  
138 *Ex vivo* polychromatic flow cytometry (ICS). PBMC were washed in R10 and rested overnight.  
139 The next day, cells were washed and stimulated for 5 h in the presence of brefeldin A ( $10 \mu\text{g/ml}$ )  
140 with either staphylococcal enterotoxin B ( $1 \mu\text{g/ml}$ ; Sigma-Aldrich) as a positive control, HIV-1  
141 peptides ( $2 \mu\text{g/ml}$  each peptide/sample), or no peptide as a negative control. Cells were washed  
142 twice with PBS and stained with ViViD cell viability reagent (Life Sciences, Grand Island, NY)  
143 Intracellular staining was performed using standard techniques (BD Biosciences; cytokine flow  
144 cytometry protocol) using previously titrated monoclonal (mAb) reagents. Anti-CD3-APCCy7, -  
145 CD8-PerCPCy5.5, -IFN- $\gamma$  -PE-Cy7, -IL-2-PE, and -TNF- $\alpha$ -allophycocyanin (BD/Pharmingen.).  
146 Data acquisition was performed on an LSRII flow cytometer (BD Biosciences, San Jose, CA),  
147 collecting 100,000–200,000 viable lymphocyte gated, or 10,000–40,000 CD8+ events per  
148 sample, and analyzed with FlowJo software (Tree Star). Positive responses were designated  
149 when the percentage of bright cytokine+/CD8+ T cells was twice that of the negative control.

150

#### 151 *Criteria for selecting immune correlates to compare in A\*02(+/-) subgroups*

152 After finding the association between HLA A\*02 and VE we decided to repeat the immune  
153 correlates analysis in subgroups of participants with and without the A\*02 allele, to test if the  
154 allele was also associated with the established immune correlates of risk (CoRs). For this reason  
155 and to preserve statistical power we limited the analysis to immunological assays that were found  
156 to be significant correlates of risk prior to multiplicity adjustment in either the primary or



157 secondary analysis of the Haynes et al. study [15]. Specifically, we tested the following assays,  
158 which had the following CoR results: (1) Env V1/V2 IgG antibody binding (OR=0.57, p = 0.01,  
159 q=0.08) (2) IgA binding to a panel of Env isolates (M-B gD) (OR=1.54, p = 0.03, q=0.08) (3)  
160 IgA binding to consensus A Env gp140 (OR=3.71, p = 0.001, q = 0.1) (4) IgA antibody binding  
161 to gp120-C1 MQEDVISLWDQSLKPCVKLTPLCV (OR=3.15, p = 0.003, q=0.13) (5) V2  
162 hotspot peptide microarray (OR = 0.64, p = 0.03), (6) PBMC Luminex cytokine score (OR =  
163 0.31, p = 0.02, q = 0.27).
